# Supplementary material for: A new luminescent lanthanide supramolecular network possessing free Lewis base sites for highly selective and sensitive Cu2+ sensing
Source: Royal Society of Chemistry journal article supplement (doi:10.1039/c6pp00059b), 2016-04-26
Supplement: c6pp00059b1.pdf [file c6pp00059b1.pdf]

## **A new luminescent lanthanide supramolecular network possessing free Lewis base sites for highly selective and sensitive Cu<sup>2+</sup> sensing**

Tianshu Chu<sup>a</sup>, Yunsong Hu<sup>a</sup>, Jinlun Wu<sup>a</sup>, Chenghui Zeng<sup>a, b</sup>, Yangyi Yang<sup>a, \*</sup> and Seik Weng Ng<sup>[c]</sup>

<sup>a</sup>*MOE Key Laboratory of Bioinorganic and Synthetic Chemistry, KLGHEI of Environment and Energy Chemistry, School of Chemistry and Chemical Engineering, Sun Yat-Sen University, Guangzhou, 510275, P. R. China.*

<sup>b</sup>*College of Chemistry and Chemical Engineering, Jiangxi Normal University, Nanchang, 330022, P. R. China*

<sup>c</sup>*Chemistry Department, Faculty of Science, King Abdulaziz University, PO Box 80203 Jeddah, Saudi Arabia*

\* Corresponding author: [cesyyy@mail.sysu.edu.cn](mailto:cesyyy@mail.sysu.edu.cn)

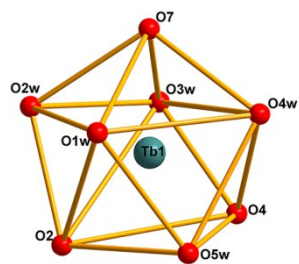

(a)

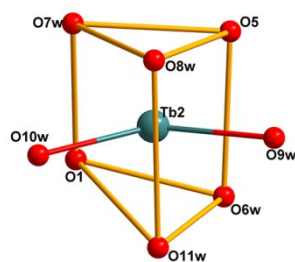

(b)

**Fig. S1** Coordination environments of (a) Tb1 and (b) Tb2 in the dinuclear unit.

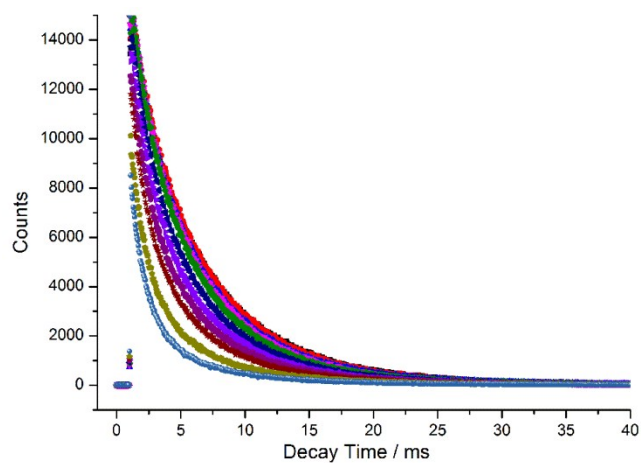

**Fig. S2** Decay time of **3** (0.0001 M) in the presence and absence of  $\text{Cu}^{2+}$ . The concentration of  $\text{Cu}^{2+}$  is from 0.00005 M to 0.001 M.

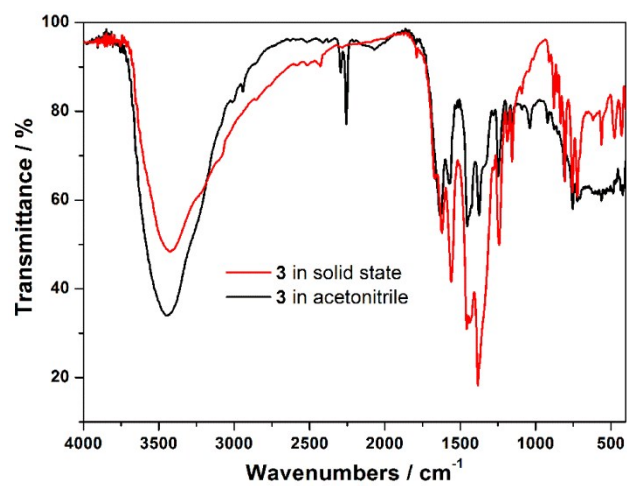

**Fig. S3** Infrared spectra of **3** in solid state and in acetonitrile solution.

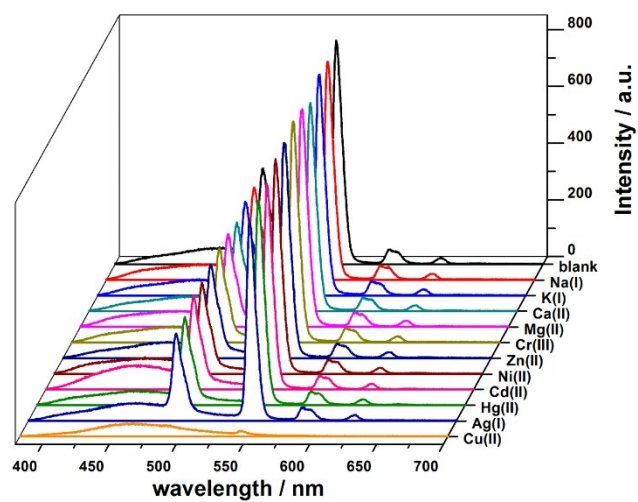

**Fig. S4** Emission spectra of **3** dissolved in acetonitrile containing 0.005 M different metal ions at an excitation of 352 nm.

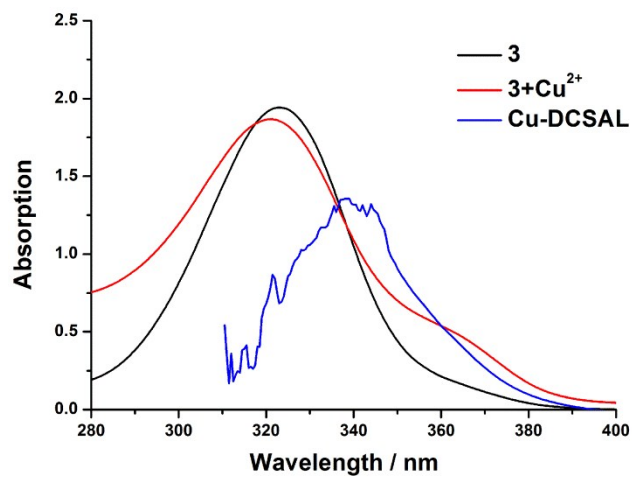

**Fig. S5** UV-vis spectra of acetonitrile solution of **3** (0.0001 M) in the presence and absence of Cu<sup>2+</sup>. The concentration of Cu<sup>2+</sup> is 0.001 M

**Table S1** Selected Bond Lengths complexes 1-3

| 1            |          |              |          |
|--------------|----------|--------------|----------|
| Eu(1)-O(1)   | 2.329(4) | Eu(1)-O(7)   | 2.343(4) |
| Eu(1)-O(4W)  | 2.367(4) | Eu(1)-O(2W)  | 2.399(4) |
| Eu(1)-O(5)   | 2.412(4) | Eu(1)-O(3W)  | 2.435(4) |
| Eu(1)-O(1W)  | 2.469(4) | Eu(1)-O(5W)  | 2.492(4) |
| Eu(2)-O(4)   | 2.306(4) | Eu(2)-O(2)   | 2.386(4) |
| Eu(2)-O(7W)  | 2.395(4) | Eu(2)-O(11W) | 2.406(4) |
| Eu(2)-O(6W)  | 2.416(4) | Eu(2)-O(8W)  | 2.422(4) |
| Eu(2)-O(10W) | 2.425(4) | Eu(2)-O(9W)  | 2.464(4) |
| 2            |          |              |          |
| Gd(1)-O(1)   | 2.321(3) | Gd(1)-O(7)   | 2.331(3) |
| Gd(1)-O(4W)  | 2.353(4) | Gd(1)-O(2W)  | 2.397(4) |
| Gd(1)-O(5)   | 2.397(4) | Gd(1)-O(3W)  | 2.419(4) |
| Gd(1)-O(1W)  | 2.461(4) | Gd(1)-O(5W)  | 2.477(4) |
| Gd(2)-O(4)   | 2.299(4) | Gd(2)-O(2)   | 2.371(3) |
| Gd(2)-O(7W)  | 2.382(4) | Gd(2)-O(11W) | 2.396(4) |
| Gd(2)-O(10W) | 2.406(4) | Gd(2)-O(8W)  | 2.406(4) |
| Gd(2)-O(6W)  | 2.411(4) | Gd(2)-O(9W)  | 2.453(3) |
| 3            |          |              |          |
| Tb(1)-O(1)   | 2.273(6) | Tb(1)-O(5)   | 2.337(6) |
| Tb(1)-O(7)   | 2.289(6) | Tb(1)-O(1w)  | 2.409(7) |
| Tb(1)-O(2w)  | 2.334(6) | Tb(1)-O(3w)  | 2.363(6) |
| Tb(1)-O(4w)  | 2.296(6) | Tb(1)-O(5w)  | 2.438(6) |
| Tb(2)-O(2)   | 2.309(6) | Tb(2)-O(4)   | 2.244(7) |
| Tb(2)-O(6w)  | 2.362(6) | Tb(2)-O(7w)  | 2.334(6) |
| Tb(2)-O(8w)  | 2.361(7) | Tb(2)-O(9w)  | 2.407(6) |
| Tb(2)-O(10w) | 2.362(6) | Tb(2)-O(11w) | 2.348(6) |
